# Supplementary material
Source: PubMed Central journal article supplement (PMC9878436)
Supplement: jamapsychiatry-e224350-s003.pdf [file jamapsychiatry-e224350-s003.pdf]

Tkachev A, Stekolshchikova E, Vanyushkina A, et al. Lipid alteration signature in the blood plasma of individuals with schizophrenia, depression, and bipolar disorder. *JAMA Psychiatry*. Published online January 25, 2023. doi:10.1001/jamapsychiatry.2022.4350

## Data Sharing Statement

### Data

**Data available:** No

**Additional Information:** Due to national data protection legislation, ethical considerations and specific consent constraints, the data sets analyzed are not publicly available. However, interested researchers can obtain deidentified data sets after approval from the study boards of the individual studies. Proposals to use data from the PsyCourse Study can be submitted via <http://www.psycourse.de/openscience-en.html>. The data sets for the RU and CN cohorts are available from the corresponding authors among reasonable request and obtaining data release clearance.
